# Supplementary figures and images for: Electrochemical Characterization of Novel Polyantimonic-Acid-Based Proton Conductors for Low- and Intermediate-Temperature Fuel Cells
Source: MDPI journal article supplement (doi:10.3390/app112411877), 2021-12-14

Supplementary data.

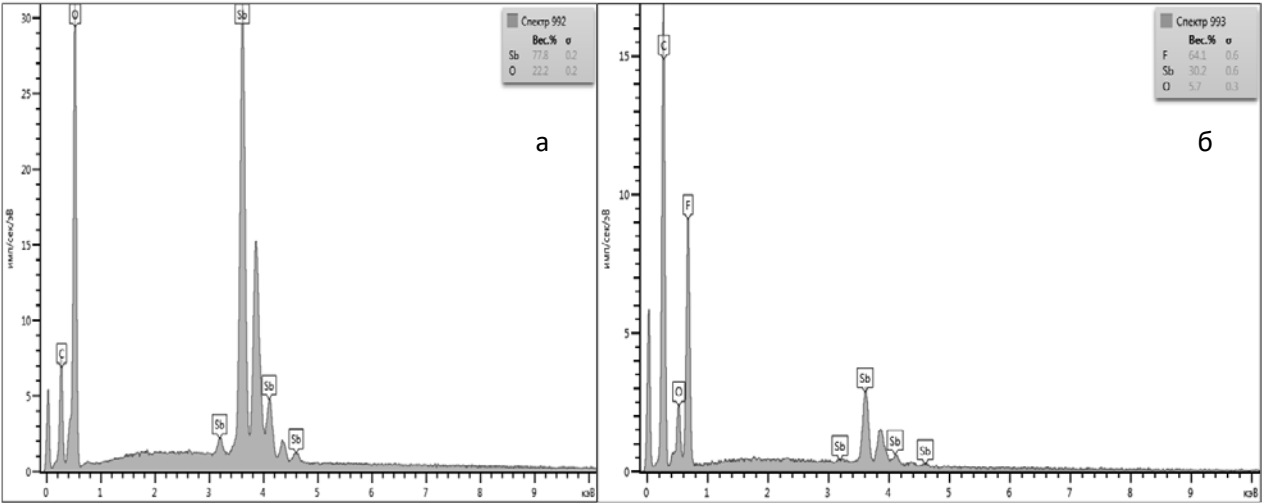

Supplement: s1 [file s1]
